# Supplementary material for: Low-coordinated Co–Mn diatomic sites derived from metal–organic framework nanorods promote electrocatalytic CO2 reduction
Source: Royal Society of Chemistry journal article supplement (doi:10.1039/d4ta02261k), 2024-01-01
Supplement: d4ta02261k1.pdf [file d4ta02261k1.pdf]

## **Supplementary Information for**

### **Low-coordinated Co-Mn diatomic sites derived from metal-organic framework nanorod promote electrocatalytic CO<sub>2</sub> reduction**

Jiajing Pei,<sup>‡a,b</sup> Guikai Zhang,<sup>‡a,c</sup> Jiangwen Liao,<sup>a,c</sup> Shufang Ji,<sup>d</sup> Huan Huang,<sup>a</sup> Ping Wang,<sup>b</sup>  
Pengfei An,<sup>\*a</sup> Shengqi Chu<sup>\*a</sup> and Juncai Dong<sup>\*a,c</sup>

## **Table of contents**

- 1. Reagents**
- 2. Synthesis of L-Co<sub>1</sub>Mn<sub>1</sub>-NC DS catalyst**
- 3. Characterizations**
- 4. Electrochemical measurements**
- 5. Data analysis**
- 6. XAFS Data Process**
- 7. In-situ ATR-SEIRAS Measurements**
- 8. Density Functional Theory**
- 9. Supporting Figures and Tables**
- 10. References**

**Reagents.** Cobalt (II) acetate, nickel Manganese acetate, Zinc nitrate hexahydrate ( $\text{Zn}(\text{NO}_3)_2 \cdot 6\text{H}_2\text{O}$ ), 2-methylimidazole, cetyltrimethylammonium bromide (CTAB), tetraethyl orthosilicate, Potassium bicarbonate ( $\text{KHCO}_3$ , 99.999%), Nafion D-521 dispersion (5% w/w in water and 1-propanol), were purchased from Alfa Aesar. Methanol, ethanol and sodium hydroxide (analytical grade) were obtained from Sinopharm Chemical. Nafion 211 membrane was purchased from Dupont. 18.2 M $\Omega$  cm ultrapure water was purified by milli-Q instrument. High purity Helium gas (99.9999%) and carbon dioxide (99.999%) were purchased at Haipu Gas Company. All the chemicals were analytical grade and used without further purification.

**Synthesis of L-Co<sub>1</sub>Mn<sub>1</sub>-NC DS catalyst.** Briefly, a solution was prepared by dissolving 1.813 g of  $\text{Zn}(\text{NO}_3)_2 \cdot 6\text{H}_2\text{O}$  and 17.5 mg of CTAB in 12.5 ml of  $\text{H}_2\text{O}$ , while 5.6752 g of 2-methylimidazole was dissolved in 87.5 ml of  $\text{H}_2\text{O}$ . The two solutions were combined and agitated for a duration of 5 minutes, after which they were allowed to stand at room temperature for a period of 3 hours. After that, the white ZIF-8 nanorod precipitate was subjected to centrifugation, followed by multiple washes with methanol and  $\text{H}_2\text{O}$ , and then dried at 60 °C under vacuum conditions. Subsequently, 300 mg of ZIF-8 nanorods were dispersed using ultrasonication in a solution consisting of 100 ml of ultrapure water. To this dispersion, 75 mg CTAB and 30 mg NaOH were introduced and stirred for a duration of 5 minutes. a solution comprising 0.6 mL of tetraethyl orthosilicate in 3 mL of methanol was incrementally introduced into the mixture with continuous stirring. After being stirred for a duration of 30 minutes, the resultant solution underwent centrifugation, washing, and subsequent vacuum drying at a temperature of 60 °C over the course of the night. The ZIF-8@SiO<sub>2</sub> powder was subsequently subjected to pyrolysis at a temperature of 650 °C for a duration of 2 h in an argon atmosphere within a tube furnace. The resultant products were subsequently distributed in a 3 M NaOH solution and agitated at a temperature of 50 °C for a duration of 12 h. Following this, the combination was subjected to centrifugation, rinsed with ultrapure water to achieve a neutral pH, and dried at a temperature of 60 °C in order to acquire the nanorod-shaped substrate. 200 mg of carbon carrier was accurately weighed

and then dispersed in 50 mL of ethanol. The dispersion was then subjected to sonication for a duration of 1 hour to ensure a homogeneous distribution. Subsequently, 0.6 mL of  $\text{Co}(\text{oAc})_2$  and 0.4 mL of  $\text{Mn}(\text{oAc})_2$  ethanol solution (10 mg/mL) were added dropwise in turn, followed by stirring for 24 h. The resulting mixture was then stirred for a duration of 24 hours, after which the mixtures were subjected to drying at 60 °C under vacuum conditions. The  $\text{L-Co}_1\text{Mn}_1\text{-NC DS}$  catalyst was synthesized through the calcination of the powder at a temperature of 1000 °C for a duration of 2 h in an Ar atmosphere.

**Synthesis of  $\text{Co}_1\text{Mn}_1\text{-NC DS}$  catalyst.** The synthesis procedures of  $\text{Co}_1\text{Mn}_1\text{-NC}$  were similar to that of  $\text{L-Co}_1\text{Mn}_1\text{-NC}$  sample, except that the finally pyrolysis temperature was changed to 900 °C for 3 h.

**Synthesis of  $\text{Co}_1\text{-NC}$  and  $\text{Mn}_1\text{-NC}$  catalyst.** The synthesis procedures of individual  $\text{Co}_1\text{-NC}$  and  $\text{Mn}_1\text{-NC}$  catalysts were similar to that of  $\text{L-Co}_1\text{Mn}_1\text{-NC}$  sample, except that the finally pyrolysis temperature was changed to 900 °C for 3 h and only one metal precursor (Co or Mn) was added at the same time.

**Characterizations.** The configuration of the atomic catalysts was examined using transmission electron microscopy (TEM) recorded by H7700 instrument, and scanning electron microscopy (SEM) images were captured with the Hitachi-SU8010 instrument. Images for EDS mapping were obtained utilizing a JEM-2010F electron microscope fitted with an energy-dispersive X-ray spectrometer, functioning at 200 kV. The HAADF-STEM images were captured using a JEOL JEM-ARM200F microscope with an acceleration voltage of 300 kV. The atomic configuration of the  $\text{L-Co}_1\text{Mn}_1\text{-NC}$  catalyst was analyzed utilizing a JEOL ARM-200CF transmission electron microscope running at 200 keV and outfitted with dual spherical aberration (Cs) correctors. X-ray diffraction (XRD) patterns were obtained using a Bruker AXS D8 FOCUS X-ray powder diffractometer equipped with  $\text{Cu K}\alpha$  radiation. X-ray photoelectron spectroscopy (XPS) analyses were carried out utilizing a Perkin Elmer Physics PHI 5300 spectrometer with  $\text{Al K}\alpha$  nonmonochromatic radiation. The metal content was determined via inductively coupled plasma optical emission spectrometry (ICP-OES)

on a Thermo Fisher IRIS Intrepid II instrument. Raman spectra were collected employing a Renishaw in Via-Reflex spectrometer system excited by a 514-nm laser.

**Electrochemical measurements.** The electrochemical performance was evaluated by Chenhua CHI 760E with a typical three-electrode setup. A Nafion 211 membrane was placed between the cathodic and anodic chambers. Pt plate was used as the counter electrode, Ag/AgCl (saturated KCl solution) was used as the reference electrode, and the electrolyte was CO<sub>2</sub> saturated 0.5 M KHCO<sub>3</sub> solution. The flow rate of CO<sub>2</sub> was controlled at 20 sccm. Prior to the electrochemical tests, the electrolytes were further saturated with high-purity CO<sub>2</sub> (99.999%) for 30 minutes to eliminate dissolved oxygen. For the preparation of the working electrode, 5 mg of catalysts were mixed in a solution containing 500  $\mu$ L of distilled water, 500  $\mu$ L of isopropanol, and 20  $\mu$ L of 5 wt% Nafion, followed by sonication for 2 h. Subsequently, 80  $\mu$ L of the resulting ink was deposited onto Carbon fiber paper, achieving a mass loading of approximately 0.4 mg·cm<sup>-2</sup>. Linear sweep voltammetry measurements were conducted with a scan rate of 10 mV s<sup>-1</sup>. All LSV and constant potential data are corrected by iR compensation. The iR compensation of electrochemical data was obtained mainly through the test impedance spectrum, and it was determined by potentiostatic electrochemical impedance spectroscopy at frequencies ranging from 0.1 Hz to 100 kHz. According to the Nernst equation ( $E_{RHE}=E_{SCE}+0.059\times pH+0.197$  V, at 25 °C), all potentials were calculated with respect to the reversible hydrogen electrode (RHE) scale. The gas products of electrolysis were detected on the Shimadzu 2014 plus gas chromatography equipped with FID detector and ShinCarbon ST 100/120 packed column.

In order to achieve a greater current density, the electrolysis configuration was modified from an H-cell to a home-made CO<sub>2</sub> flow cell, incorporating gas diffusion electrodes (GDL) and employing a standard three-electrode measurement setup (Fig. R10). The cathode working electrode utilized in the flow cell was the L-Co<sub>1</sub>Mn<sub>1</sub>-NC catalyst applied onto a GDL with a loading density of 0.6 mg cm<sup>-2</sup>. The anode counter electrode employed was the IrO<sub>2</sub> catalyst also sprayed on a GDL with a loading of 0.6 mg cm<sup>-2</sup>, occurring the oxygen evolution reaction. A Nafion 117 membrane was placed

between the cathodic and anodic chambers of flow cell. On the cathode side, electrolyte (0.5 M KHCO<sub>3</sub>) was pumped by a syringe pump (PHD 2000, Harvard Apparatus) with a constant flow rate of 10 sccm. High purity CO<sub>2</sub> gas flowed at a rate of 50 sccm behind the cathode GDL controlled by a mass flow controller (CS200, Beijing Sevenstar). An Ag/AgCl (saturated KCl) reference electrode was employed. The solution resistance was determined by potentiostatic electrochemical impedance spectroscopy at frequencies ranging from 0.1 Hz to 100 kHz. All the measured potentials using three-electrode setup were manually compensated.

### Data analysis.

According to the definition of FE:

$$FE = \frac{\alpha \times F \times n}{Q} = \frac{\alpha \times F \times n}{I_{total} \times t}$$

$$P \times V = n \times R \times T \rightarrow n = \frac{P_0 \times V_{total} \times \nu}{R \times T_0}$$

$$FE = \frac{\alpha \times F}{I_{total}} \times \frac{P_0 \times \nu}{R \times T_0} \times \frac{V_{volume}}{t} = \frac{\alpha \times F \times P_0 \times \nu \times V_{flow\ rate}}{R \times T_0 \times I_{total}}$$

Where  $\alpha$  is the number of electrons transferred during reaction ( $\alpha=2$ ); F: Faradaic constant (96500 C mol<sup>-1</sup>);  $P_0$  is atmospheric pressure (101325 N m<sup>-2</sup>);  $\nu$  is gas concentration;  $V_{flow\ rate}$  is volumetric flow rate;  $R$  is ideal gas constant (8.314 N m mol<sup>-1</sup> K<sup>-1</sup>);  $T_0$  is reaction temperature (298,15 K);  $I_{total}$  is total current.

TOF for CO production was calculated as follow equation:

$$TOF = \frac{I_{product}/nF}{m_{cat} \times \omega/M_{metal}} \times 3600$$

TOF = turnover frequency, h<sup>-1</sup>.

$I_{product}$  = partial current for certain product, A.

$n = 2$ , the number of electrons transferred for CO production.

$F = 96485$  C mol<sup>-1</sup>, Faradaic constant.

$m_{\text{cat}}$  = the mass of catalyst on the carbon paper, g.

$\omega$  = metal loading in the catalyst.

$M_{\text{metal}}$  = atomic mass of Co (58.9 g mol<sup>-1</sup>) for Co<sub>1</sub>-NC, atomic mass of Mn (54.9 g mol<sup>-1</sup>) for Mn<sub>1</sub>-NC, and atomic mass of 57.3 g mol<sup>-1</sup> for diatomic site catalysts (based on the ratio of Co and Mn).

**XAFS Data Analysis.** The EXAFS data were processed according to the standard procedures using the Athena and Artemis implemented in the IFEFFIT software packages. The acquired EXAFS data were processed according to the standard procedures using the ATHENA module. The EXAFS spectra were obtained by subtracting the post-edge background from the overall absorption and then normalizing with respect to the edge-jump step. Subsequently, the  $\chi(k)$  data were Fourier transformed to real (R) space using a hanning windows ( $dk=1.0 \text{ \AA}^{-1}$ ) to separate the EXAFS contributions from different coordination shells. To obtain the quantitative structural parameters around the atoms being investigated, least-squares parameter fitting was performed using the ARTEMIS module of IFEFFIT software packages.

The following EXAFS equation was employed:

$$\chi(k) = \sum_j \frac{N_j S_o^2 F_j(k)}{k R_j^2} \exp[-2k^2 \sigma_j^2] \exp\left[-\frac{2R_j}{\lambda(k)}\right] \sin[2k R_j + \phi_j(k)]$$

$S_o^2$  is the amplitude reduction factor,  $F_j(k)$  is the effective curved-wave backscattering amplitude,  $N_j$  is the number of neighbors in the  $j^{\text{th}}$  atomic shell,  $R_j$  is the distance between the X-ray absorbing central atom and the atoms in the  $j^{\text{th}}$  atomic shell (backscatterer),  $\lambda$  is the mean free path in  $\text{\AA}$ ,  $\phi_j(k)$  is the phase shift (including the phase shift for each shell and the total central atom phase shift),  $\sigma_j$  is the Debye-Waller parameter of the  $j^{\text{th}}$  atomic shell (variation of distances around the average  $R_j$ ). The functions  $F_j(k)$ ,  $\lambda$  and  $\phi_j(k)$  were calculated with the ab initio code FEFF8.2. The coordination numbers of model samples were fixed as the nominal values. The obtained

$S_0^2$  was fixed in the subsequent fitting. While the internal atomic distances  $R$ , Debye-Waller factor  $\sigma^2$ , and the edge-energy shift  $\Delta E_0$  were allowed to run freely.

**In situ ATR-SEIRAS Measurements.** The in situ ATR-SEIRAS spectra were acquired using a Nicolet iS50 Fourier-transform infrared (FT-IR) spectrometer, which was outfitted with a mercury cadmium telluride (MCT) detector cooled by liquid nitrogen. Additionally, a PIKE VeeMAX III variable angle attenuated total reflection (ATR) sampling accessory was employed during the measurements. The resolution of IR spectra was set to  $8\text{ cm}^{-1}$  and 64 interferograms were co-added for each spectrum. The absorption units of spectra are defined as  $A = -\log(R/R_0)$ , where  $R$  and  $R_0$  express as the reflected IR intensity concerning the sample and reference-single beam spectrum, respectively. A crystal with a Si face angle of  $60^\circ$  was employed as the reflection accessory, with the incident angle being ca.  $70^\circ$ . A chemical deposition process is utilized to apply a thin layer of Au film onto the surface of a Si crystal in order to amplify the IR signal and facilitate the movement of electrons. Initially, we conducted in situ ATR-SEIRAS on the Au film to mitigate its impact on the signal of the  $\text{CO}_2\text{RR}$ . The catalyst ink was applied onto the Au film acting as the working electrode at a loading of  $0.1\text{ mg cm}^{-2}$ . The ink was spread evenly over the surface of the Au film to minimize the impact of the film itself. A platinum wire was utilized as the counter electrode, while a SCE served as the reference electrode. The electrolyte employed in the experiment was a solution of  $0.5\text{ M KHCO}_3$  saturated with  $\text{CO}_2$ . During the in situ experiment, the chronopotentiometry technique was utilized to apply various potentials ranging from 0 to  $-1\text{ V}$  versus RHE without iR correction. Synchronously, ATR-SEIRAS spectra were acquired for each potential test. A reference background ATR-SEIRAS spectrum was obtained at 0 V.

**Computational details.** Vienna ab initio simulation package (VASP) software was used to conduct density functional theory (DFT) simulations.<sup>1</sup> In the calculation, generalized gradient approximation (GGA) with the Perdew-Burke-Ernzerhof (PBE) function was used to describe exchange correlation energy.<sup>2</sup> The projector augmented-wave (PAW) method was used to approximate the core electron states,<sup>3</sup> and the cutoff



energy with plane-wave basis sets was set as 450 eV. The gamma-centered k-mesh of  $3 \times 3 \times 1$  and energy convergence criterion of  $10^{-6}$  eV was used in the self-consistent calculation. The structure was relaxed until residual force was converged to 0.02 eV/Å in geometric structure optimization. Graphene-supported N-coordination metal catalysts were modeled to simulate their electronic properties and catalytic properties. The vacuum layer height was set at 15 Å to avoid interactions.

In CO<sub>2</sub>RR reaction pathway, Gibbs free energies were calculated using

$$\Delta G = \Delta E + \Delta ZPE - \Delta TS$$

in which  $\Delta E$ ,  $\Delta ZPE$ ,  $T$  and  $S$  denote the binding energy, zero-point energy, reaction temperature and entropy, respectively. The rate-determining step is defined as the reaction step with the greatest energy barrier.

## Supporting Figures and Tables

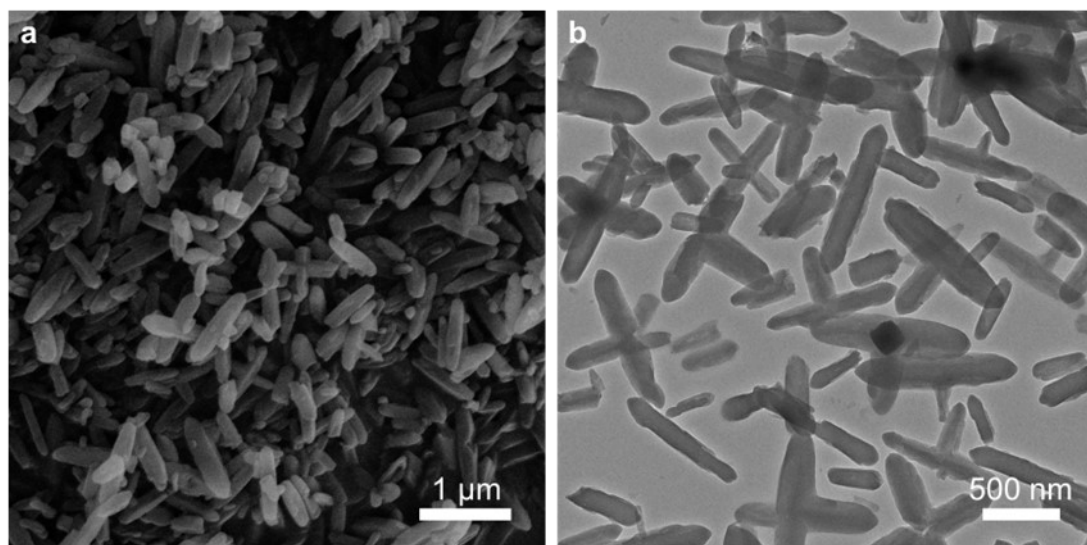

**Fig. S1** The SEM (a) and TEM (b) images of ZIF-8 nanorods.

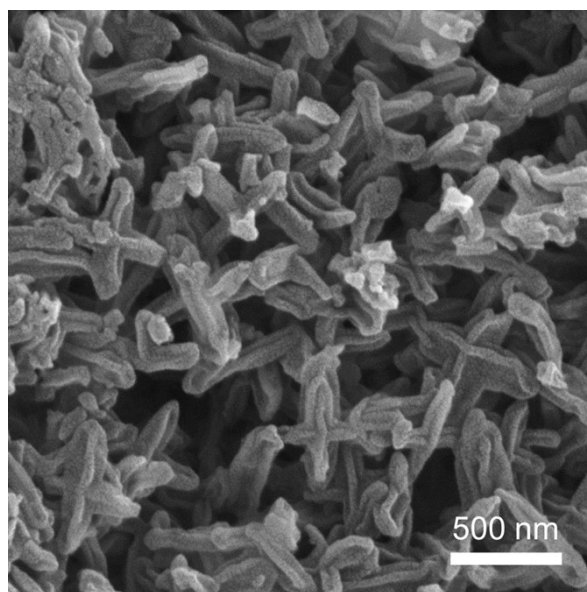

**Fig. S2** The SEM image of L-Co<sub>1</sub>Mn<sub>1</sub>-NC catalyst.

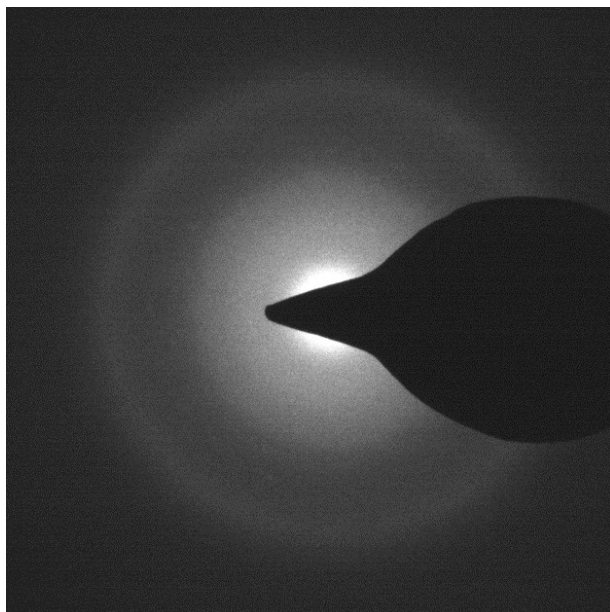

**Fig. S3** The SEAD image of L-Co<sub>1</sub>Mn<sub>1</sub>-NC catalyst.

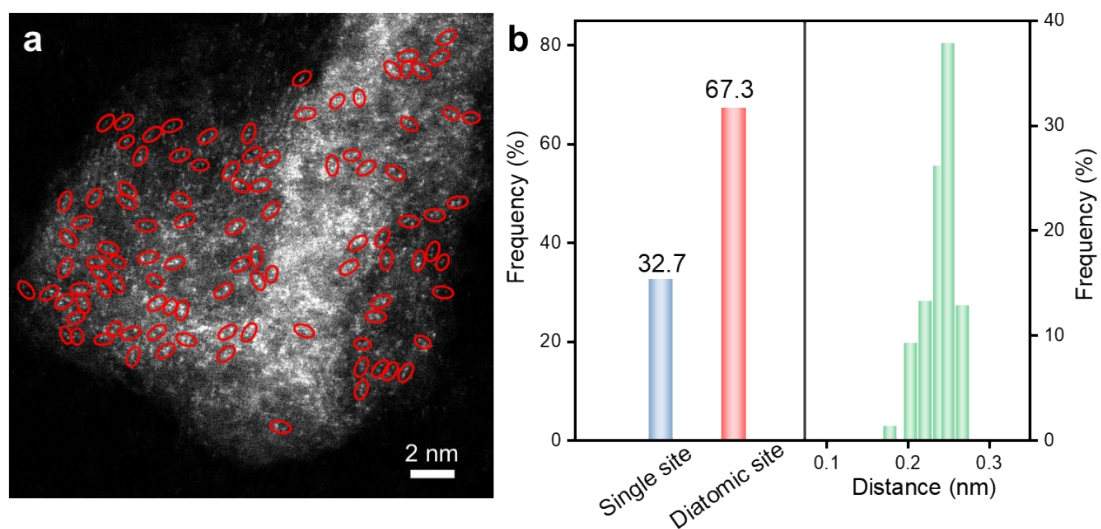

**Fig. S4** (a) The AC HAADF-STEM image of L-Co<sub>1</sub>Mn<sub>1</sub>-NC catalyst. (b) The statistical results of atomic site density and distance distribution.

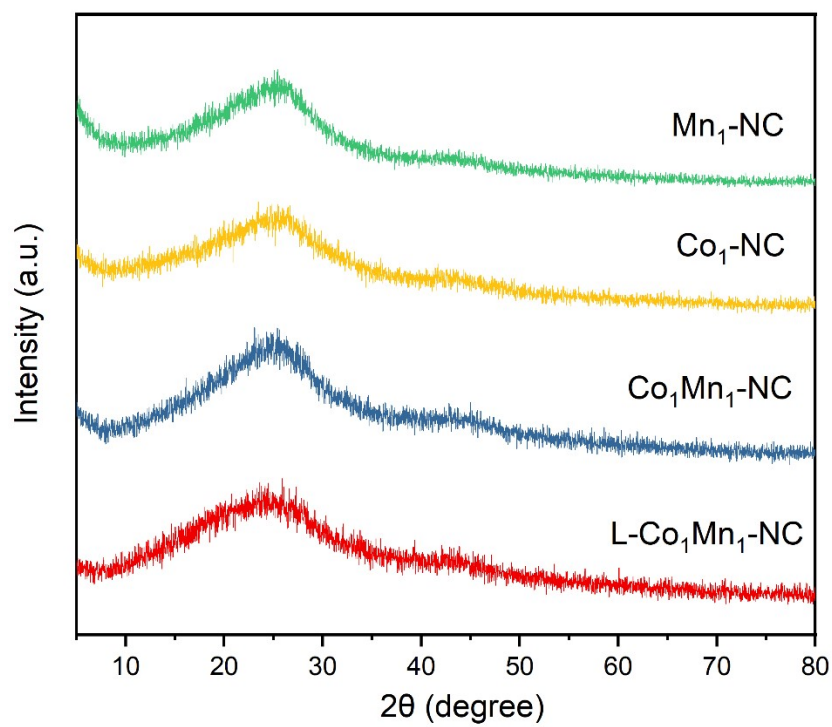

**Fig. S5** The XRD patterns of L-Co<sub>1</sub>Mn<sub>1</sub>-NC, Co<sub>1</sub>Mn<sub>1</sub>-NC, Co<sub>1</sub>-NC and Mn<sub>1</sub>-NC.

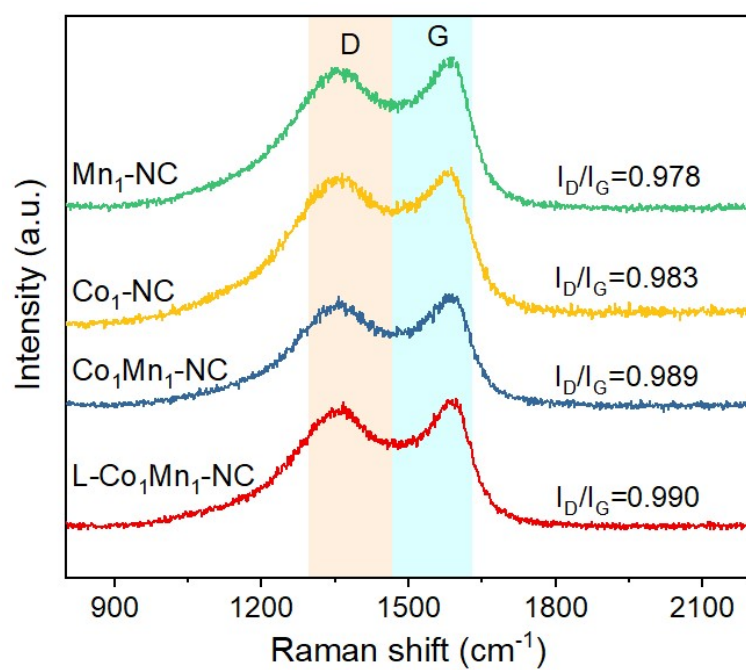

**Fig. S6** The Raman spectra of L-Co<sub>1</sub>Mn<sub>1</sub>-NC, Co<sub>1</sub>Mn<sub>1</sub>-NC, Co<sub>1</sub>-NC and Mn<sub>1</sub>-NC.

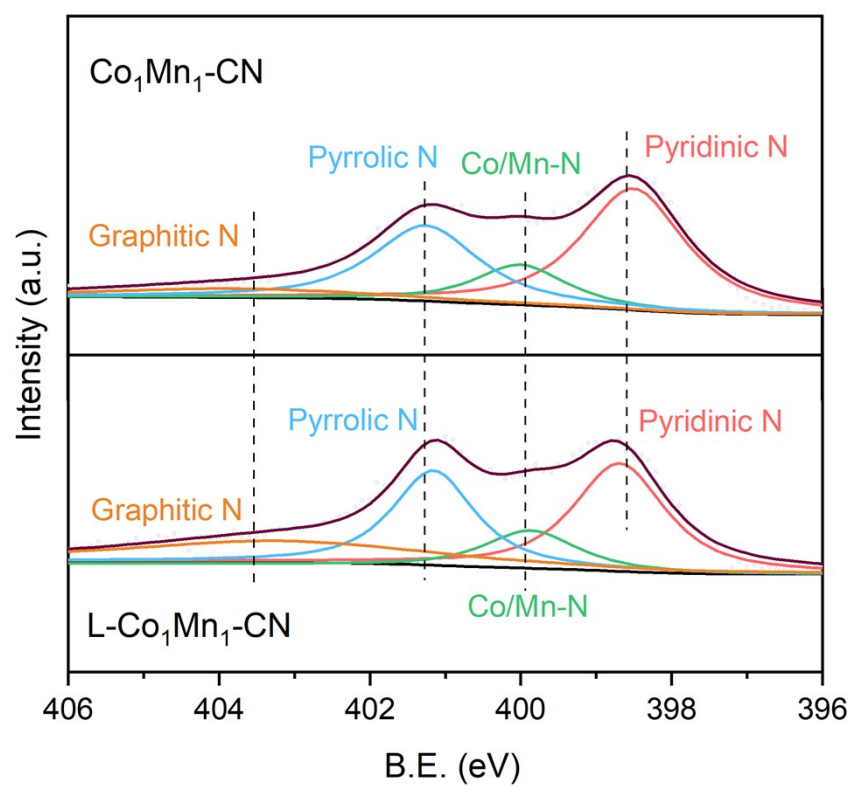

**Fig. S7** N 1s XPS spectra of  $\text{Co}_1\text{Mn}_1\text{-NC}$  and  $\text{L-Co}_1\text{Mn}_1\text{-NC}$  catalysts.



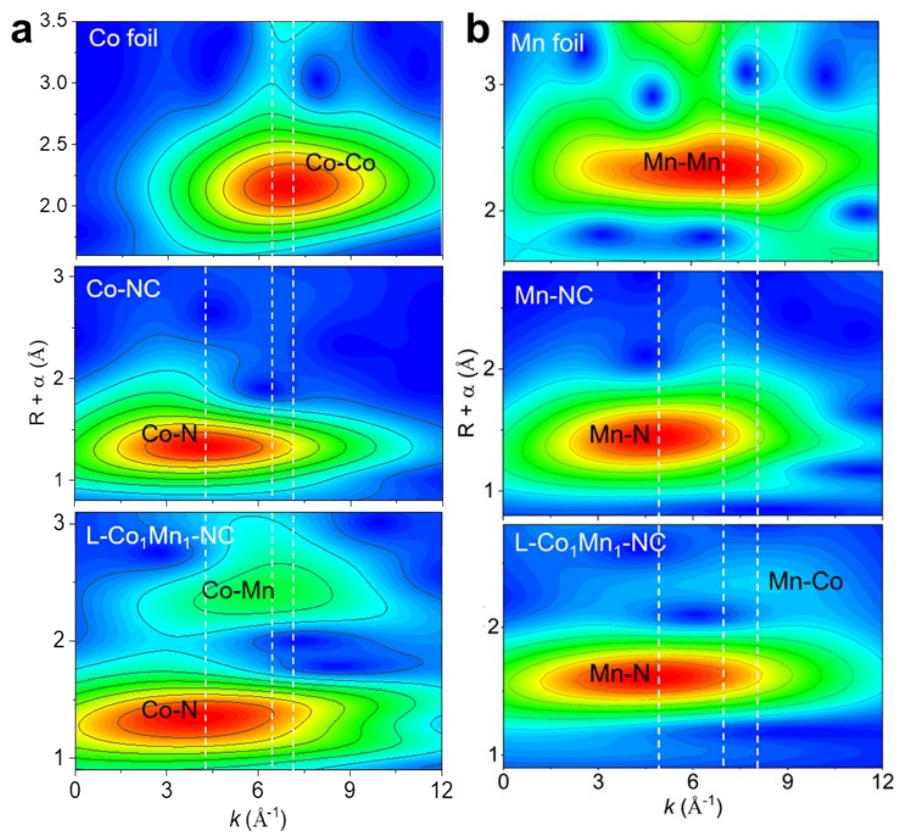

**Fig. S8** WT plots for the EXAFS signals of Co K-edge (a) for Co foil, Co<sub>1</sub>-NC, L-Co<sub>1</sub>Mn<sub>1</sub>-NC and Mn K-edge (b) for Mn foil, Mn<sub>1</sub>-NC, L-Co<sub>1</sub>Mn<sub>1</sub>-NC.

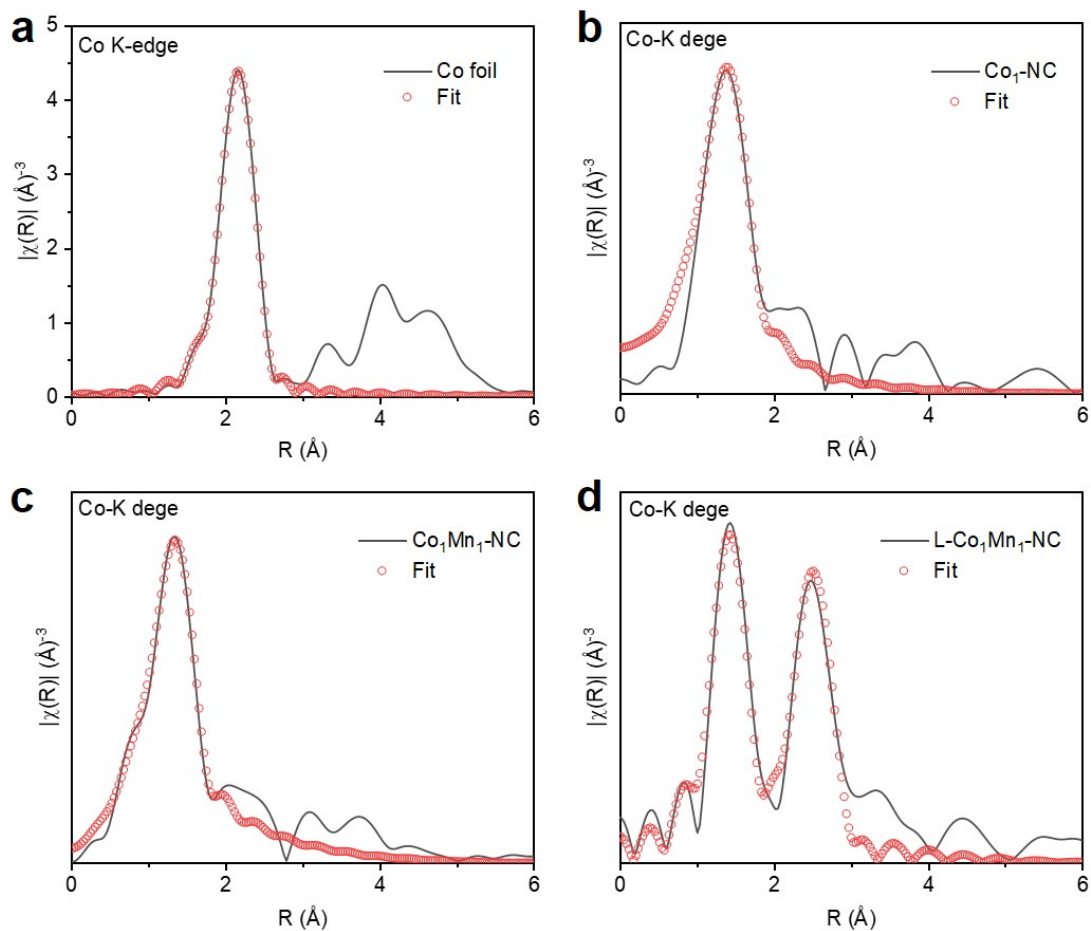

**Fig. S9** The FT-EXAFS fitting spectra of (a) Co foil, (b) Co<sub>1</sub>-NC, (c) Co<sub>1</sub>Mn<sub>1</sub>-NC and (d) L-Co<sub>1</sub>Mn<sub>1</sub>-NC catalysts at Co K-edge.

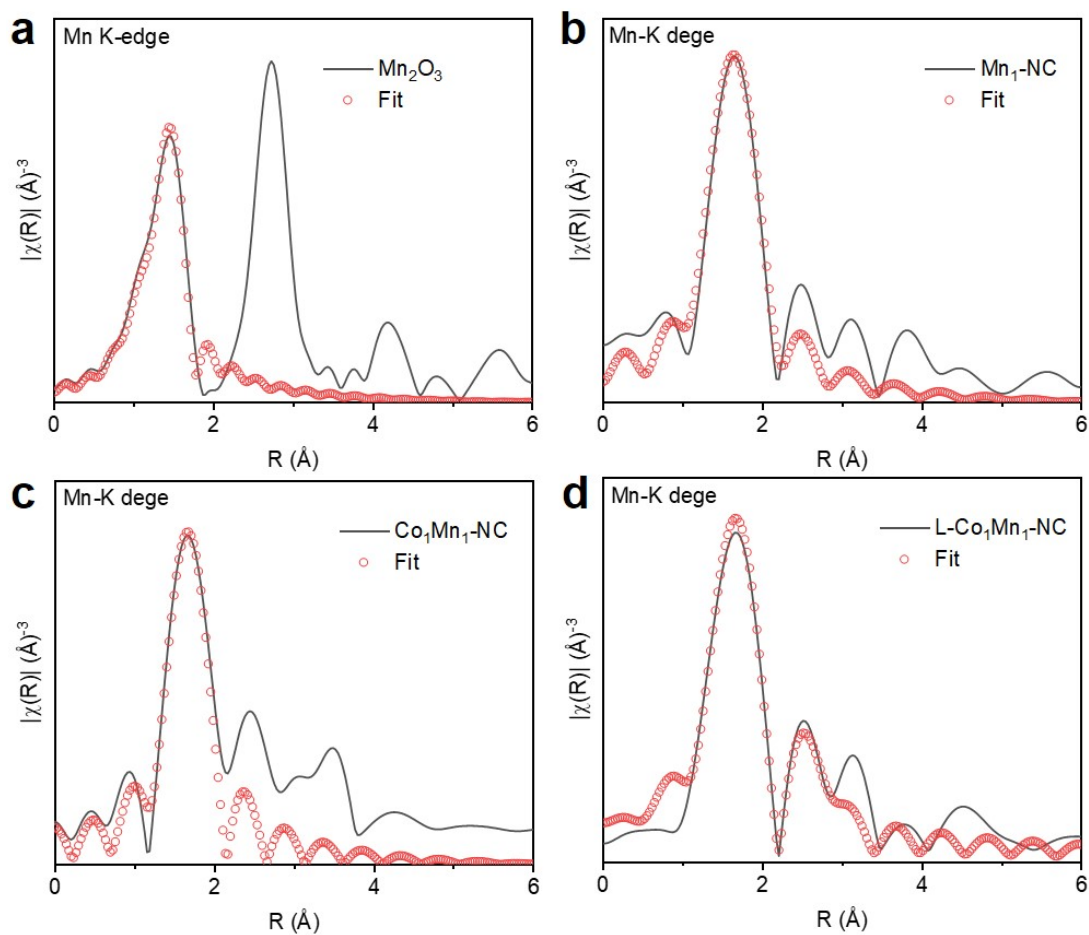

**Fig. S10** The FT-EXAFS fitting spectra of (a)  $\text{Mn}_2\text{O}_3$ , (b)  $\text{Mn}_1\text{-NC}$ , (c)  $\text{Co}_1\text{Mn}_1\text{-NC}$  and (d)  $\text{L-Co}_1\text{Mn}_1\text{-NC}$  catalysts at Mn K-edge.

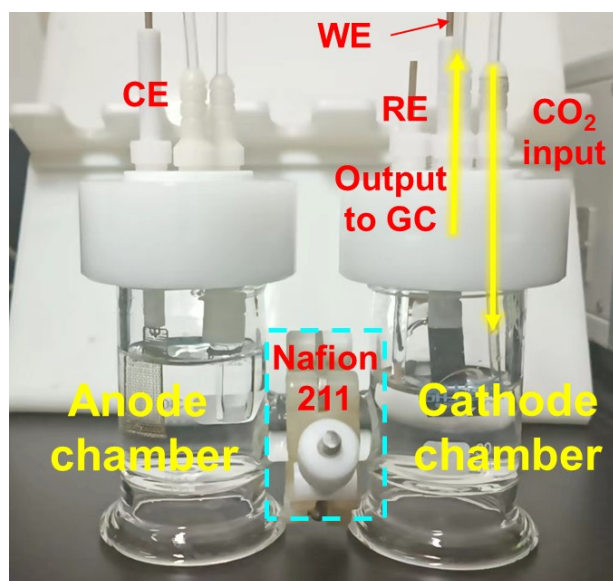

**Fig. S11** Image showing the electrochemical CO<sub>2</sub>RR measurements conducted using an H-cell setup equipped with a standard three-electrode system.

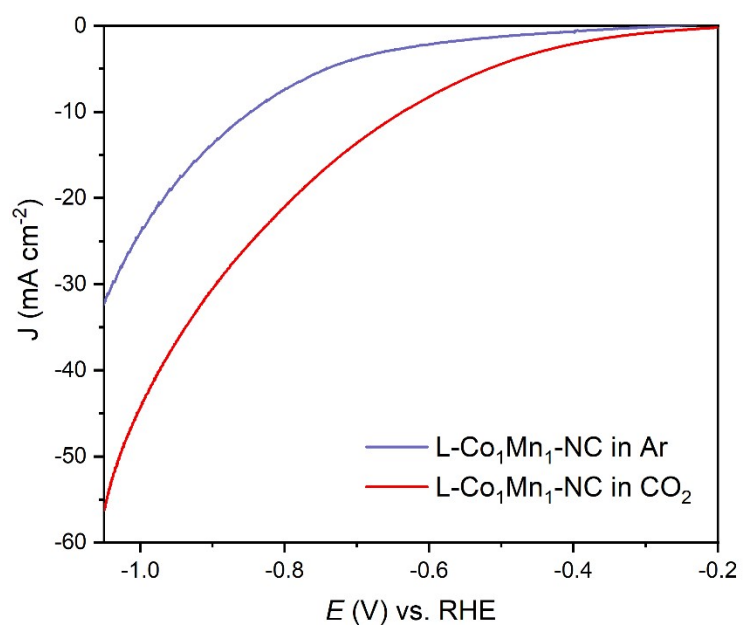

**Fig. S12** The LSV comparison curves of L-Co<sub>1</sub>Mn<sub>1</sub>-NC catalyst in Ar- and CO<sub>2</sub>-saturated 0.5M KHCO<sub>3</sub> solution.

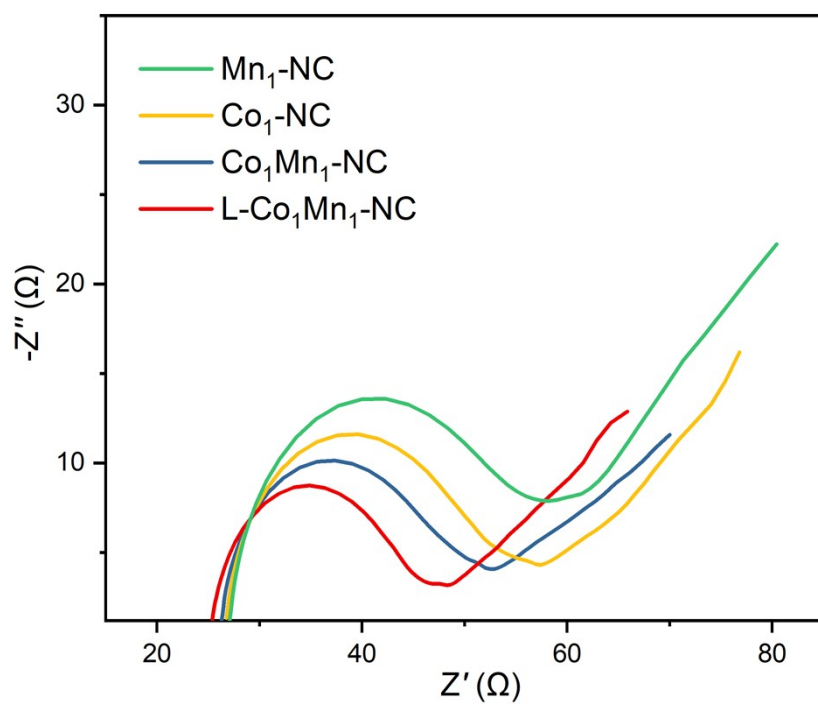

**Fig. S13** The Nyquist plots of L-Co<sub>1</sub>Mn<sub>1</sub>-NC, Co<sub>1</sub>Mn<sub>1</sub>-NC, Co<sub>1</sub>-NC, and Mn<sub>1</sub>-NC catalyst at  $-0.5$  V vs RHE.

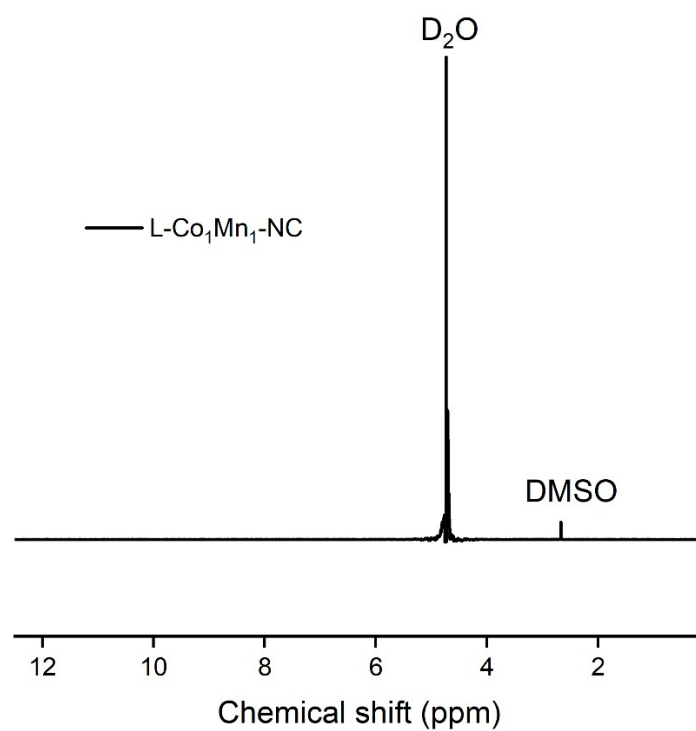

**Fig. S14** The  $^1\text{H}$ -NMR spectra of liquid products after  $\text{CO}_2\text{RR}$  test by  $\text{L-Co}_1\text{Mn}_1\text{-NC}$ .

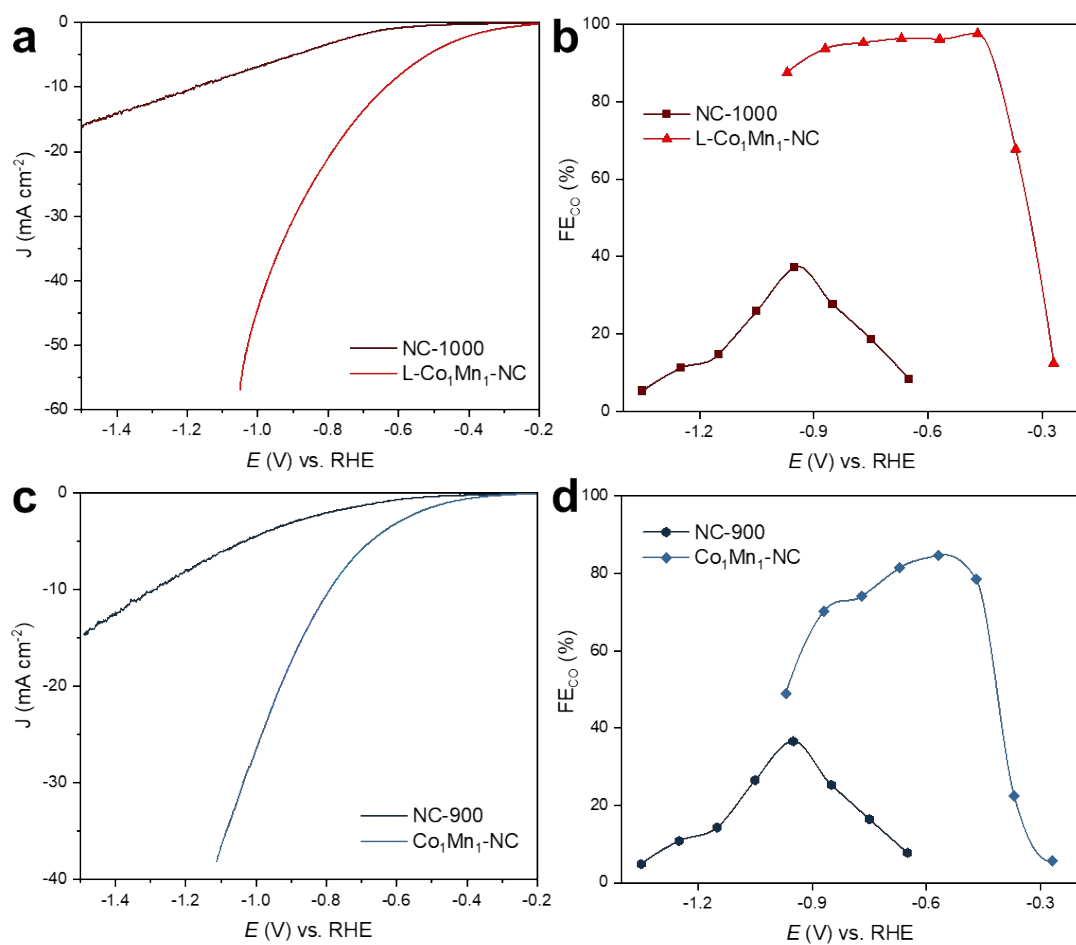

**Fig. S15** The CO<sub>2</sub>RR performances of the L-Co<sub>1</sub>Mn<sub>1</sub>-NC and Co<sub>1</sub>Mn<sub>1</sub>-NC catalysts and their carbon substrate counterparts. (a, c) Polarization curves. (b, d) FE<sub>CO</sub>.



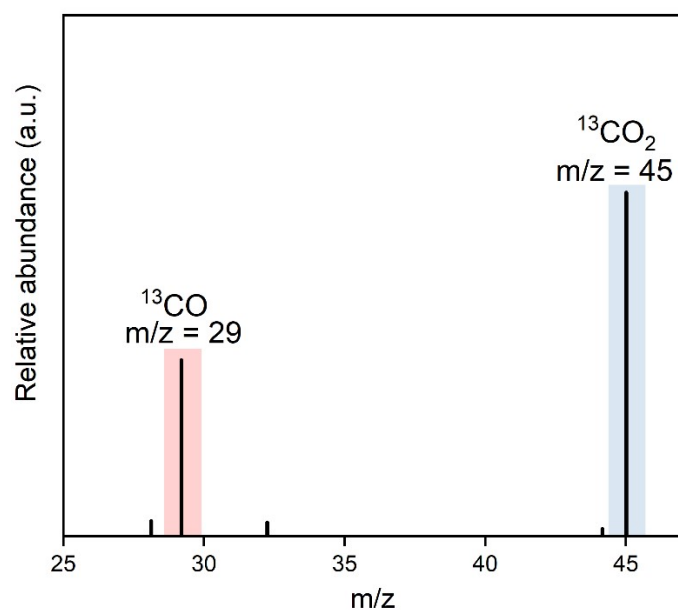

**Fig. S16** Mass spectrometry signal of  $\text{CO}_2\text{RR}$  by using  $^{13}\text{CO}_2$  as the electrocatalytic feedstock.

The study distinctly identified the peaks at positions 29 and 45 as corresponding to the  $^{13}\text{CO}$  product and  $^{13}\text{CO}_2$  feedstock, respectively. It is noteworthy that there was evidence of slight air leakage in the system, as evidenced by the detection of nitrogen ( $\text{N}_2$  at 28) and oxygen ( $\text{O}_2$  at 32) within the system.

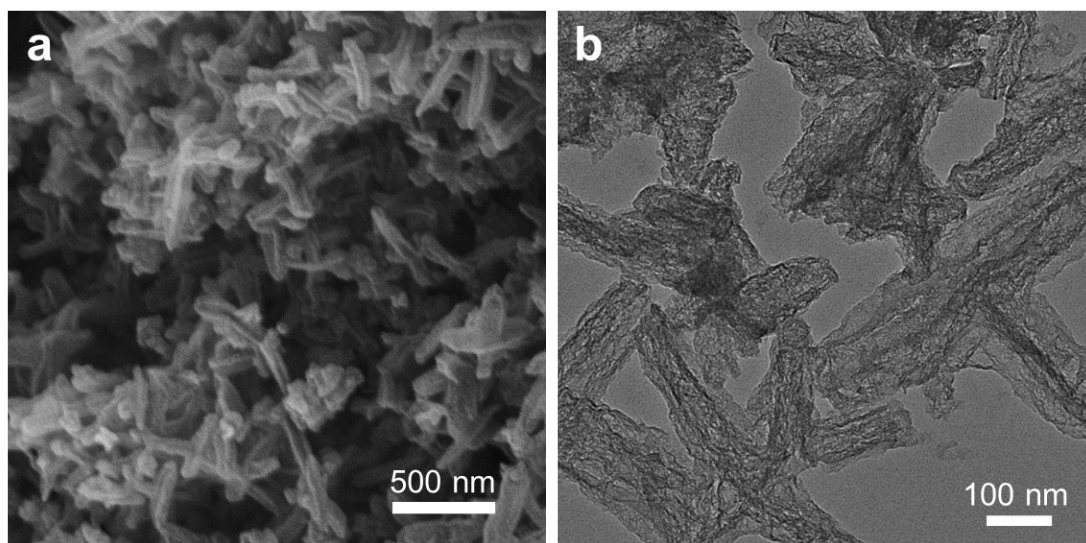

**Fig. S17** The SEM (a) and TEM (b) images of L-Co<sub>1</sub>Mn<sub>1</sub>-NC catalyst after CO<sub>2</sub>RR stability test.

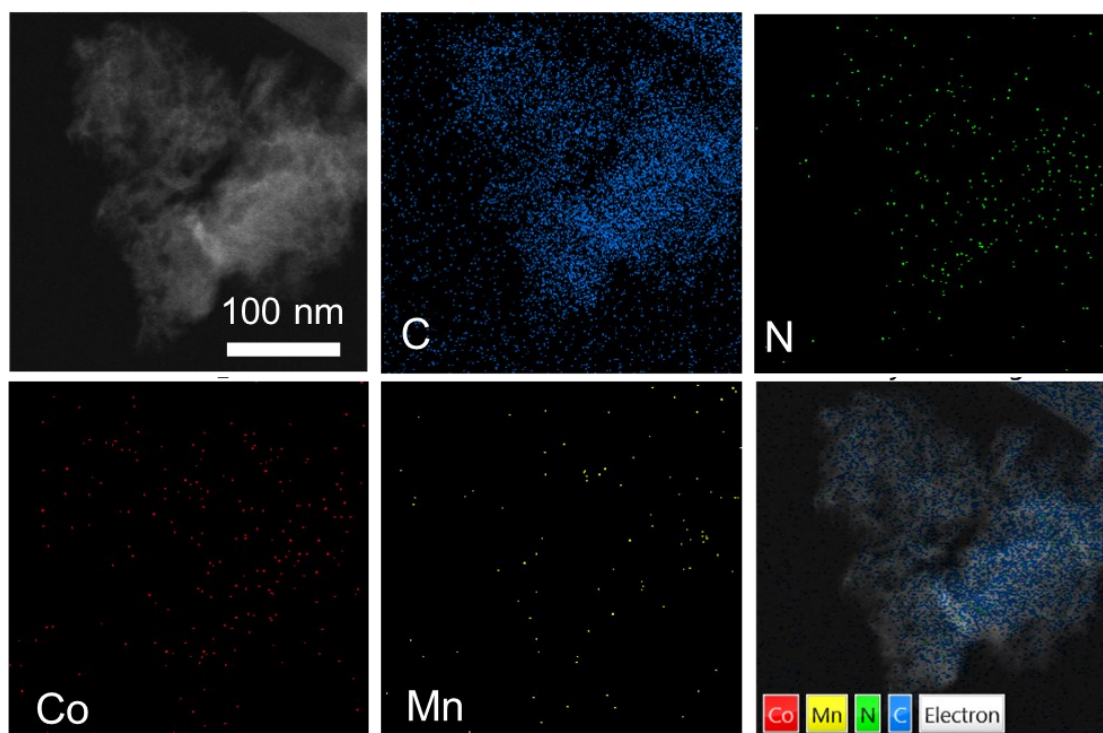

**Fig. S18** EDS mappings of L-Co<sub>1</sub>Mn<sub>1</sub>-NC catalyst after CO<sub>2</sub>RR, suggesting that Co, Mn, C, and N were still uniformly distributed on the carbon support.

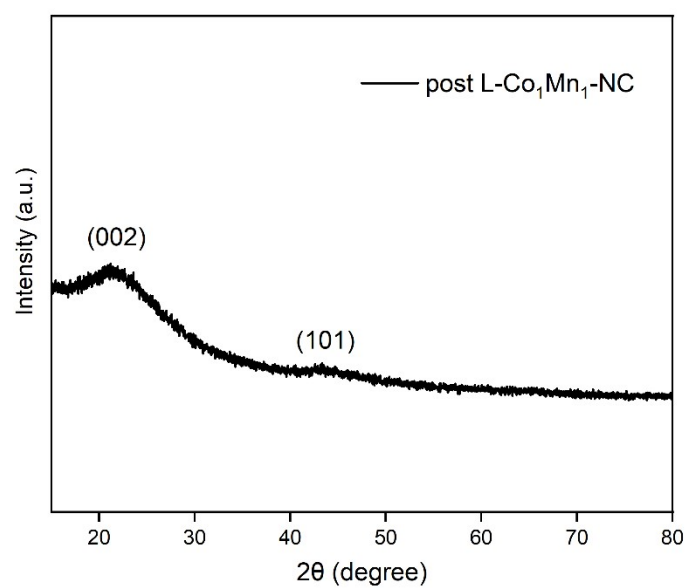

**Fig. S19** The XRD pattern of L-Co<sub>1</sub>Mn<sub>1</sub>-NC catalyst after CO<sub>2</sub>RR stability test.

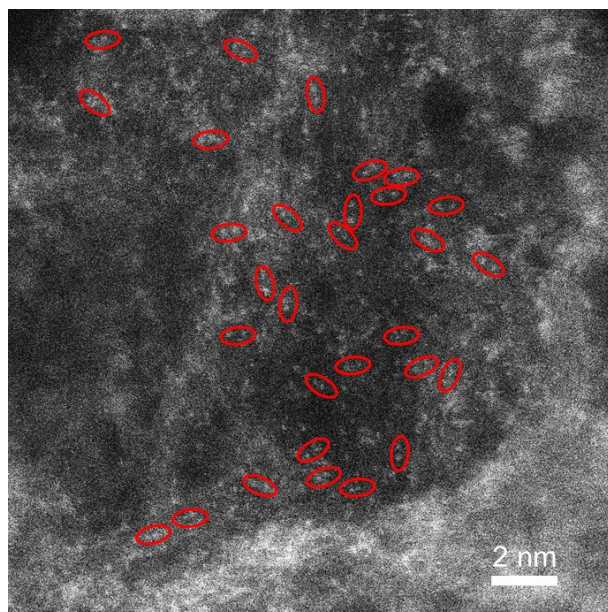

**Fig. S20** The AC HAADF-STEM image of L-Co<sub>1</sub>Mn<sub>1</sub>-NC catalyst after CO<sub>2</sub>RR.

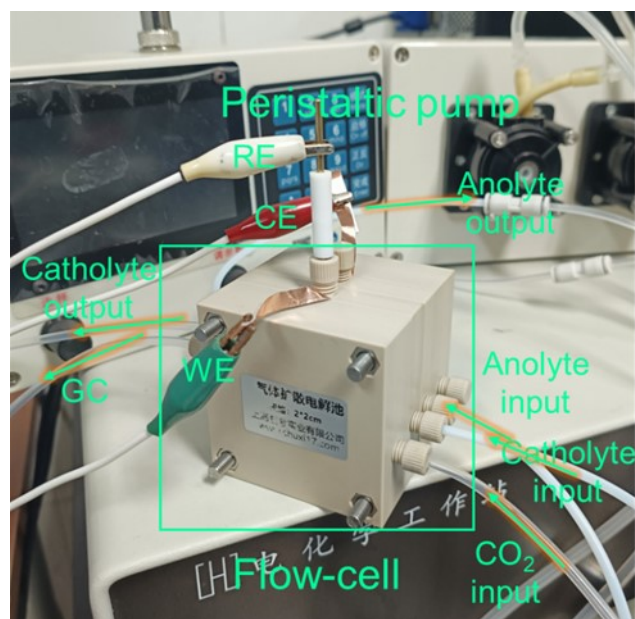

**Fig. S21** The structure photograph of the home-made CO<sub>2</sub>RR flow cell.

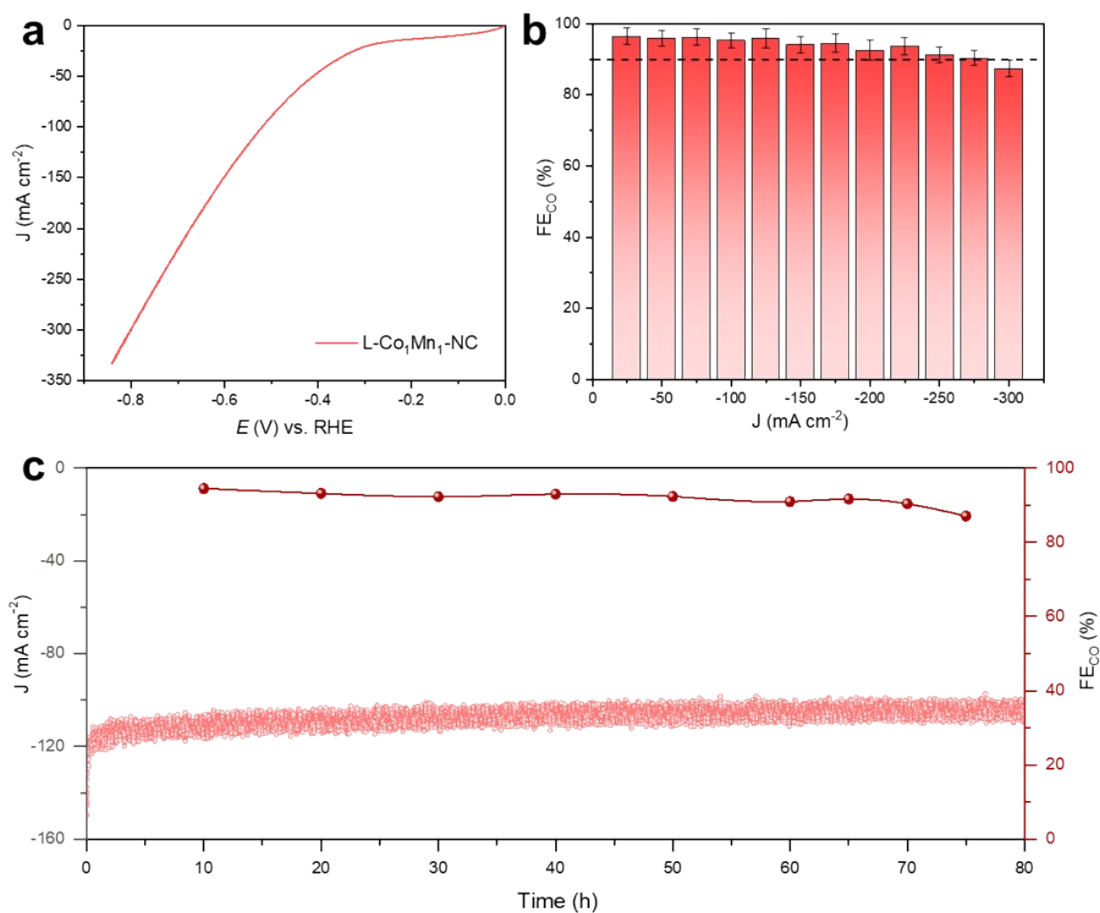

**Fig. S22** CO<sub>2</sub>RR performance of L-Co<sub>1</sub>Mn<sub>1</sub>-NC catalyst employing flow cell. (a) polarization curve. (b)  $FE_{CO}$ . (c) Chronoamperometry at -0.55 V for 50 h. The  $FE_{CO}$  was tested ever 10 h of electrolysis.

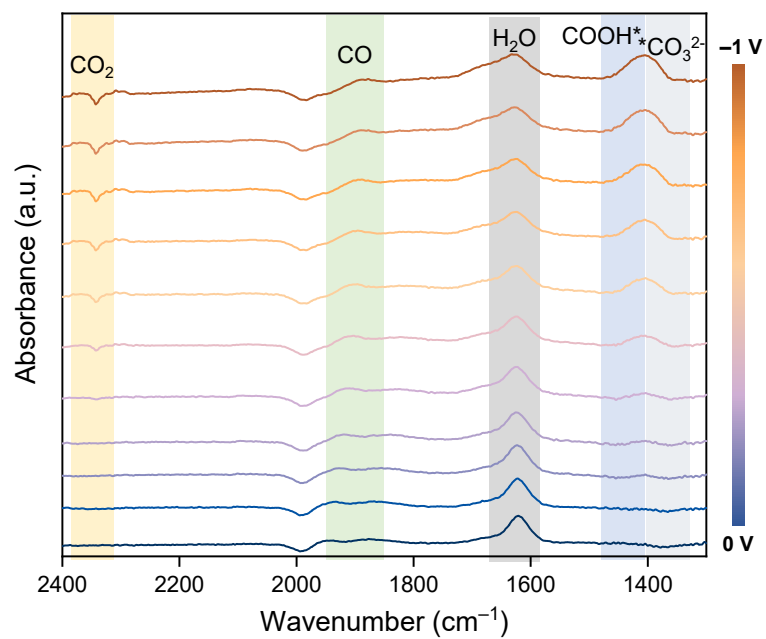

**Fig. S23** The in situ ATR-SEIRAS spectra of L-Co<sub>1</sub>Mn<sub>1</sub>-NC catalyst.



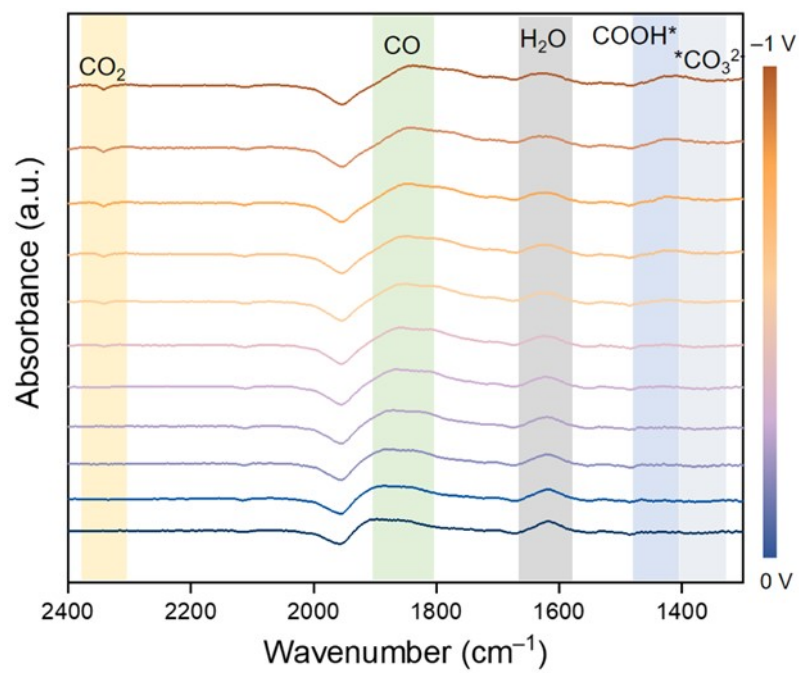

**Fig. S24** The in situ ATR-SEIRAS spectra of  $\text{Co}_1\text{Mn}_1\text{-NC}$  catalyst.

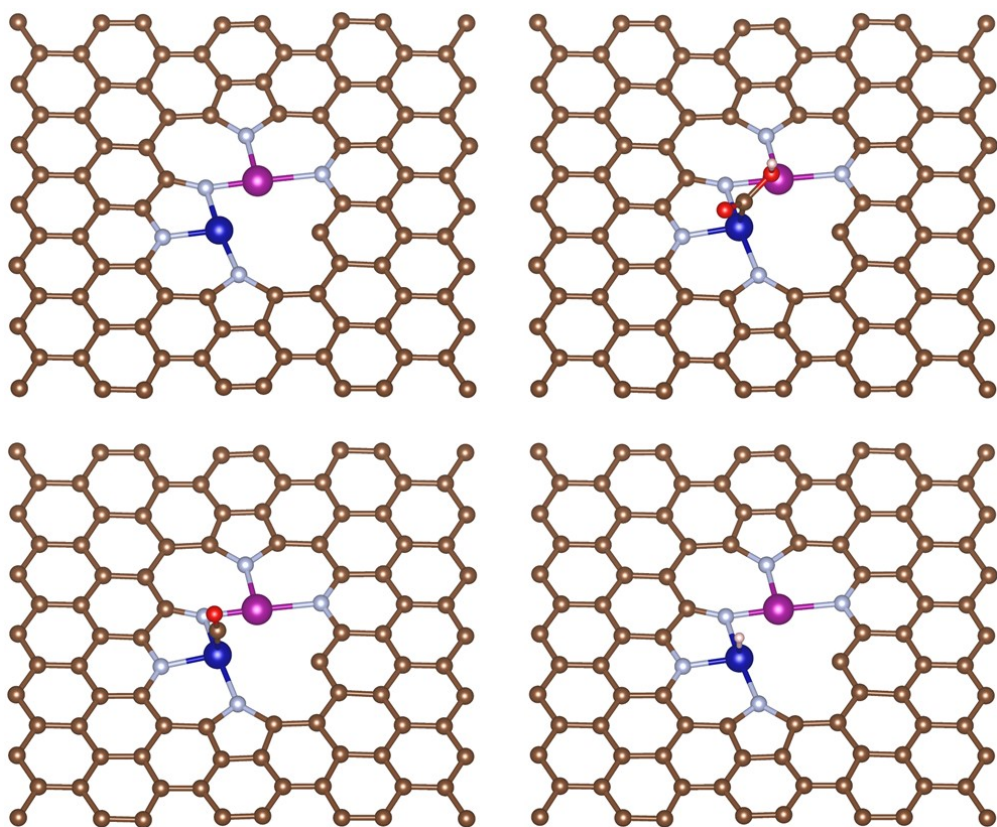

**Fig. S25** Optimized atomic structures of L-Co<sub>1</sub>Mn<sub>1</sub>-NC with COOH\*, CO\* and intermediates adsorbed on Co site.

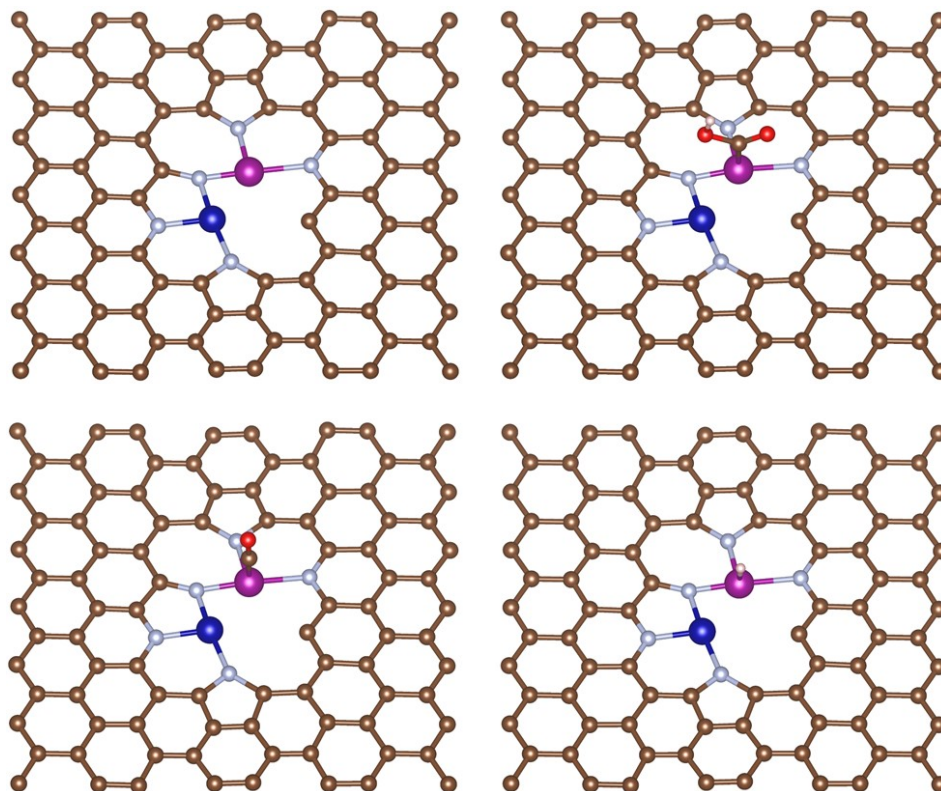

**Fig. S26** Optimized atomic structures of L-Co<sub>1</sub>Mn<sub>1</sub>-NC with COOH\*, CO\* and intermediates adsorbed on Mn site.

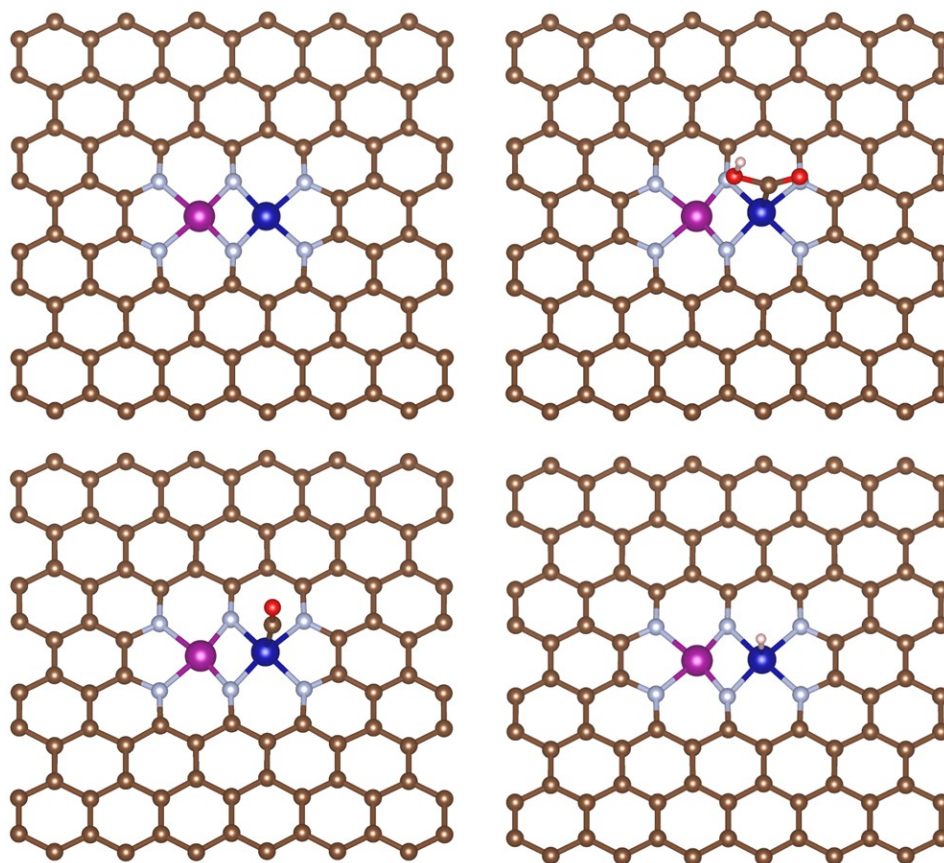

**Fig. S27** Optimized atomic structures of Co<sub>1</sub>Mn<sub>1</sub>-NC with COOH\*, CO\* and intermediates adsorbed on Co site.

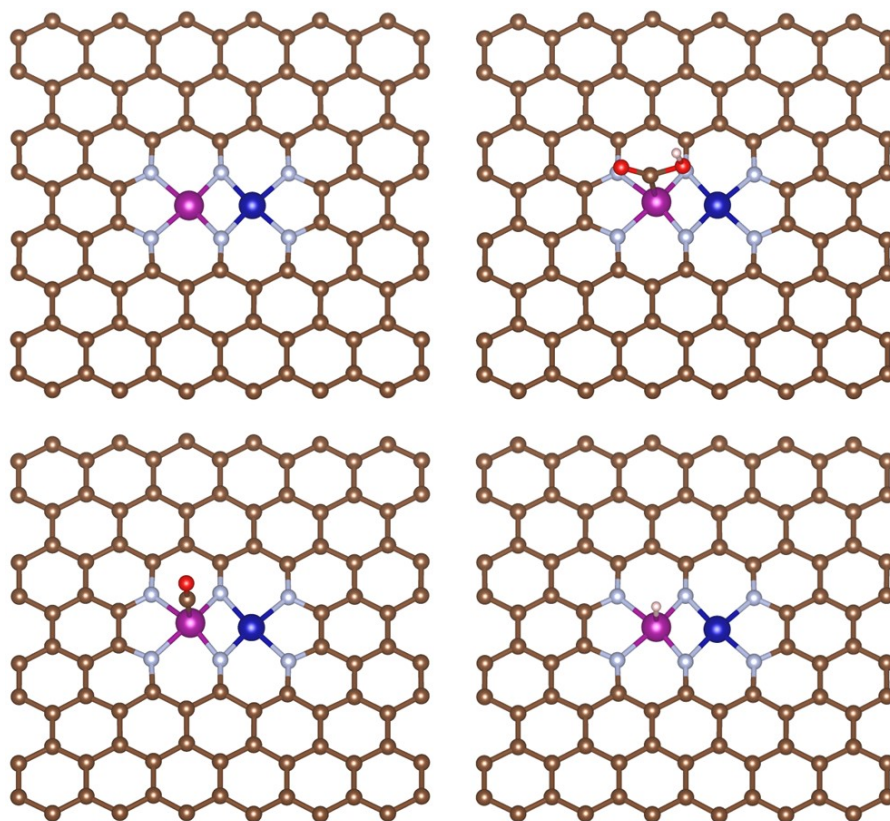

**Fig. S28** Optimized atomic structures of L-Co<sub>1</sub>Mn<sub>1</sub>-NC with COOH\*, CO\* and intermediates adsorbed on Co site.



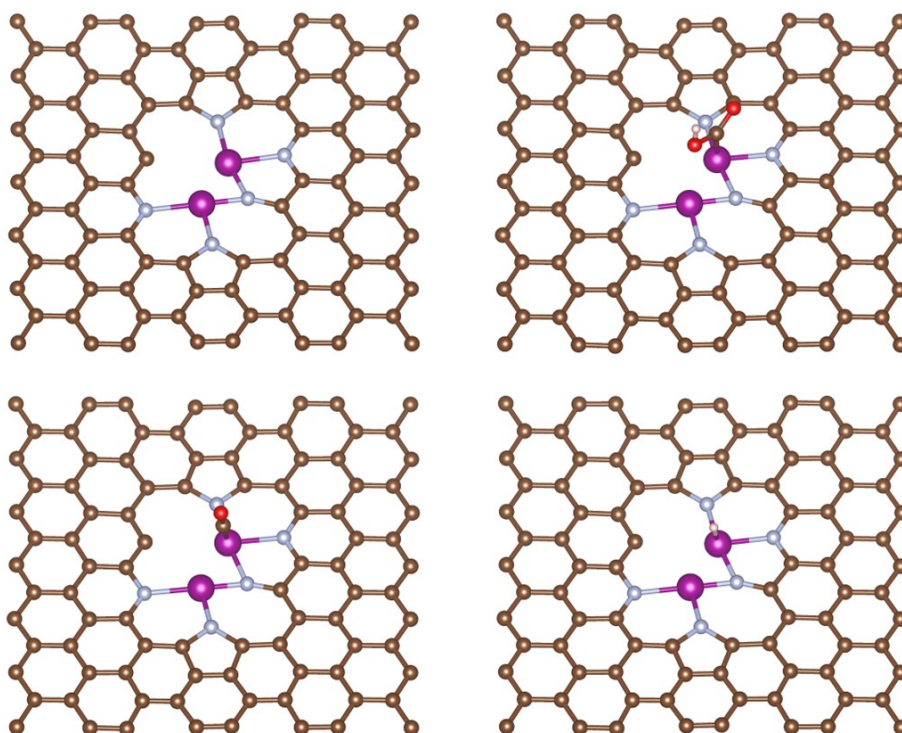

**Fig. S29** Optimized atomic structures of L-Co<sub>2</sub>-NC with COOH\*, CO\* and intermediates adsorbed on Co site.

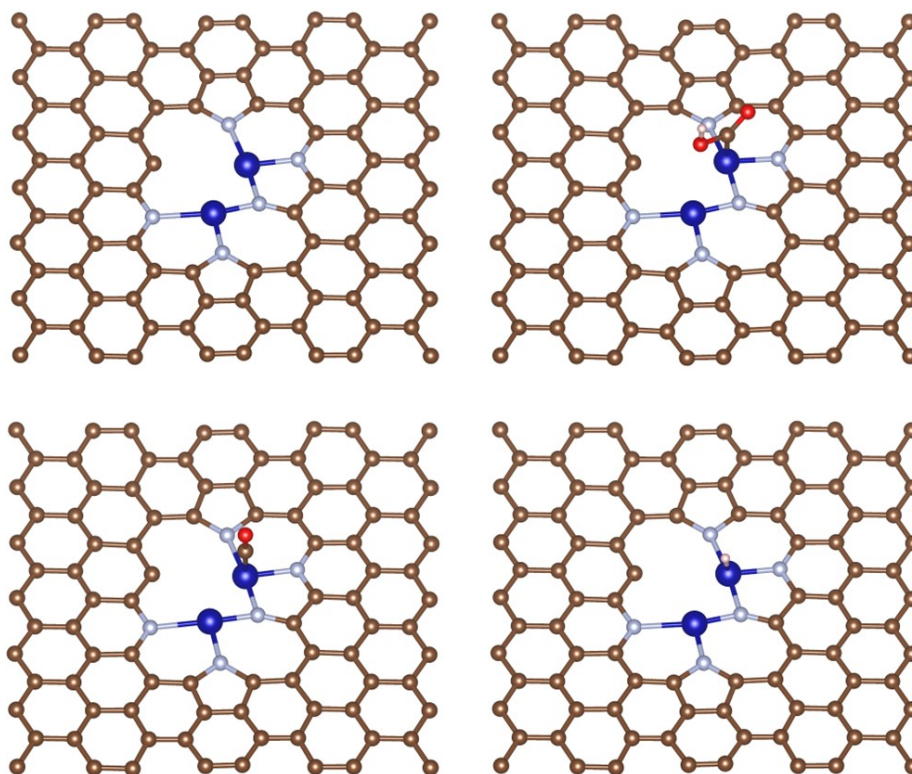

**Fig. S30** Optimized atomic structures of L-Mn<sub>2</sub>-NC with COOH\*, CO\* and intermediates adsorbed on Mn site.

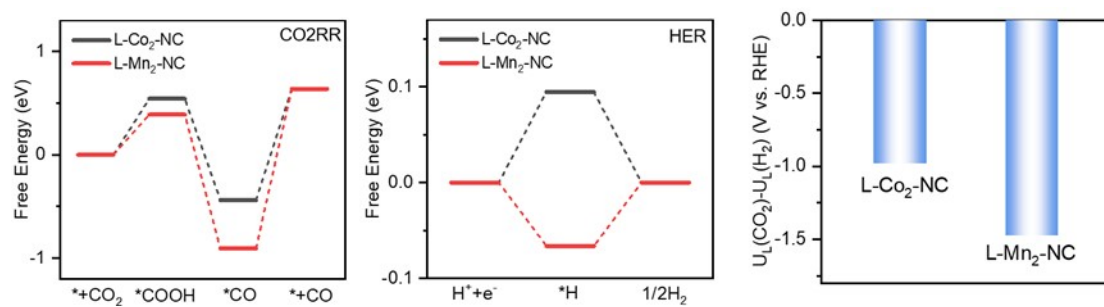

**Fig. S31** The Gibbs free energy diagrams for the CO<sub>2</sub> to CO and HER as well as the calculated limiting potentials difference of CO<sub>2</sub>RR and HER.



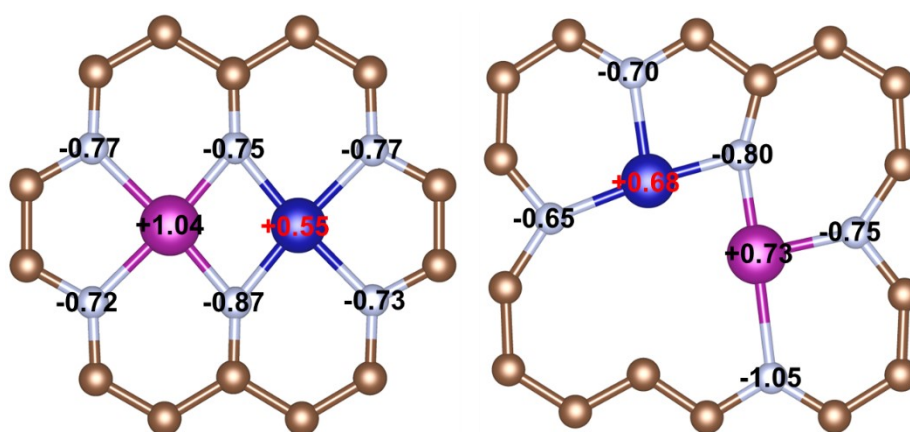

**Fig. S32** Bader charge analysis of Co<sub>1</sub>Mn<sub>1</sub>-NC and L- Co<sub>1</sub>Mn<sub>1</sub>-NC catalysts.

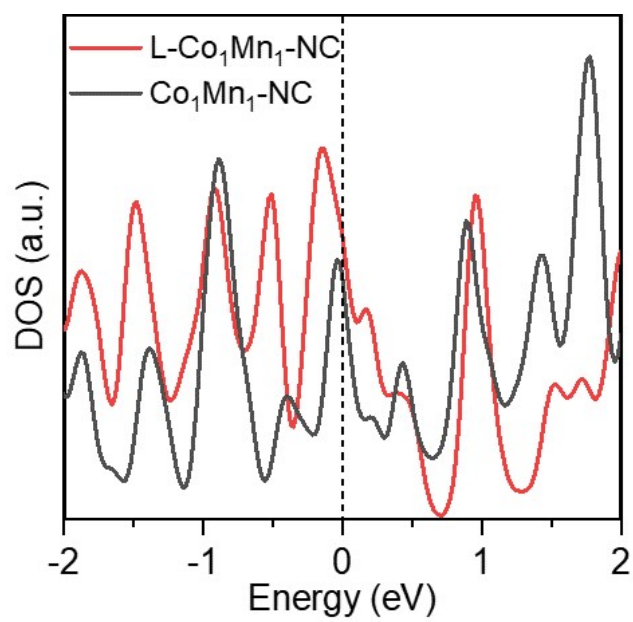

**Fig. S33** Total DOS for Co<sub>1</sub>Mn<sub>1</sub>-NC and L- Co<sub>1</sub>Mn<sub>1</sub>-NC catalyst.

**Table S1.** ICP-OES results of the L-Co<sub>1</sub>Mn<sub>1</sub>-NC, Co<sub>1</sub>Mn<sub>1</sub>-NC, Co<sub>1</sub>-NC, and Mn<sub>1</sub>-NC catalysts.

| Samples                               | Co (wt%) | Mn (wt%) |
|---------------------------------------|----------|----------|
| L-Co <sub>1</sub> Mn <sub>1</sub> -NC | 0.52     | 0.36     |
| Co <sub>1</sub> Mn <sub>1</sub> -NC   | 0.55     | 0.38     |
| Co <sub>1</sub> -NC                   | 0.91     | /        |
| Mn <sub>1</sub> -NC                   | /        | 0.88     |

**Table S2.** Structural parameters extracted from the Co K-edge EXAFS fitting ( $S_0^2=0.72$ ).

| Sample                                | Scattering pair | CN  | R(Å) | $\sigma^2(10^{-3}\text{Å}^2)$ | R factor |
|---------------------------------------|-----------------|-----|------|-------------------------------|----------|
| Co <sub>1</sub> -NC                   | Co–N            | 4.2 | 1.94 | 0.006                         | 0.009    |
| Co <sub>1</sub> Mn <sub>1</sub> -NC   | Co–N            | 3.7 | 1.93 | 0.006                         | 0.006    |
| L-Co <sub>1</sub> Mn <sub>1</sub> -NC | Co–N            | 3.2 | 1.93 | 0.010                         | 0.008    |
|                                       | Co–Mn           | 0.8 | 2.68 | 0.009                         |          |
| Co foil                               | Co–Co           | 12* | 2.49 | 0.004                         | 0.001    |

$S_0^2$  is the amplitude reduction factor; CN is the coordination number; R is interatomic distance (the bond length between Co central atoms and surrounding coordination atoms);  $\sigma^2$  is Debye-Waller factor (a measure of thermal and static disorder in absorber-scatterer distances); R factor is used to value the goodness of the fitting.

\* This value was fixed during EXAFS fitting, based on the known structure of Co foil.

Error bounds that characterize the structural parameters obtained by EXAFS spectroscopy were estimated as  $N \pm 20\%$ ;  $R \pm 1\%$ ;  $\sigma^2 \pm 20\%$ .

**Table S3.** Structural parameters extracted from the Mn K-edge EXAFS fitting ( $S_0^2=0.74$ ).

| Sample                                | Scattering pair | CN  | R(Å) | $\sigma^2(10^{-3}\text{Å}^2)$ | R factor |
|---------------------------------------|-----------------|-----|------|-------------------------------|----------|
| Mn <sub>1</sub> -NC                   | Mn–N            | 4.1 | 2.02 | 0.004                         | 0.013    |
| Co <sub>1</sub> Mn <sub>1</sub> -NC   | Mn–N            | 4.3 | 2.03 | 0.004                         | 0.008    |
| L-Co <sub>1</sub> Mn <sub>1</sub> -NC | Mn–N            | 3.1 | 2.01 | 0.008                         | 0.017    |
|                                       | Mn–Co           | 1.2 | 2.70 | 0.012                         |          |
| Mn <sub>2</sub> O <sub>3</sub>        | Mn–O            | 3*  | 1.88 | 0.003                         | 0.012    |

$S_0^2$  is the amplitude reduction factor; CN is the coordination number; R is interatomic distance (the bond length between Mn central atoms and surrounding coordination atoms);  $\sigma^2$  is Debye-Waller factor (a measure of thermal and static disorder in absorber-scatterer distances); R factor is used to value the goodness of the fitting.

\* This value was fixed during EXAFS fitting, based on the known structure of Mn<sub>2</sub>O<sub>3</sub>. Error bounds that characterize the structural parameters obtained by EXAFS spectroscopy were estimated as  $N \pm 20\%$ ;  $R \pm 1\%$ ;  $\sigma^2 \pm 20\%$ .

**Table S4.** CO<sub>2</sub>RR Performance comparison of various reported Co-based and Mn-based catalysts under the similar conditions.

| Catalysts                             | Overpotential | J <sub>CO</sub> | FE <sub>CO</sub> | TOF   | Refs.     |
|---------------------------------------|---------------|-----------------|------------------|-------|-----------|
| L-Co <sub>1</sub> Mn <sub>1</sub> -NC | 360           | 3.5             | 97.6             | 1067  | This work |
|                                       | 860           | 34.7            | 87.6             | 10535 |           |
| Co-N-Ni/NPCNSs                        | 370           | 3.2             | 96.4             | 2049  | 4         |
| Co-N <sub>2</sub>                     | 350           | ~6              | 75               | 5000  | 5         |
| Co <sub>1</sub> -N <sub>4</sub>       | 390           | ~0.8            | 30               | ~80   | 6         |
| CoPPc/CNT                             | 375           | ~4.6            | ~84              | ~1200 | 7         |
| COF-367-Co                            | 560           | 3.0             | 91               | 1900  | 8         |
| NapCo@SNG                             | 625           | ~0.23           | 95               | 1620  | 9         |
| CoN <sub>5</sub>                      | 620           | /               | 99               | 480.2 | 10        |
| MCs-(N,O)                             | 440           | 13.7            | 94.5             | /     | 11        |
| MnO <sub>2</sub> -NS/NF               | 310           | 14.1            | 71               | /     | 12        |
| Mn-N-C                                | 490           | ~3.3            | ~65              | /     | 13        |
| Mn-N-C                                | 490           | ~0.7            | ~70              | 46    | 14        |
| Mn-C <sub>3</sub> N <sub>4</sub> /CNT | 440           | 14              | 98.8             | /     | 15        |
| (Cl,N)-Mn/G                           | 490           | 9.2             | 97               | 38347 | 16        |

## References

1. G. Kresse and J. Furthmüller, *Comput. Mater. Sci.*, 1996, **6**, 15-50.
2. J. P. Perdew, K. Burke and M. Ernzerhof, *Phys. Rev. Lett.*, 1996, **77**, 3865-3868.
3. P. E. Blöchl, *Phys. Rev. B*, 1994, **50**, 17953-17979.
4. J. Pei, T. Wang, R. Sui, X. Zhang, D. Zhou, F. Qin, X. Zhao, Q. Liu, W. Yan, J. Dong, L. Zheng, A. Li, J. Mao, W. Zhu, W. Chen and Z. Zhuang, *Energy Environ. Sci.*, 2021, **14**, 3019-3028.
5. X. Wang, Z. Chen, X. Zhao, T. Yao, W. Chen, R. You, C. Zhao, G. Wu, J. Wang, W. Huang, J. Yang, X. Hong, S. Wei, Y. Wu and Y. Li, *Angew. Chem. Int. Ed.*, 2018, **57**, 1944-1948.
6. Z. Geng, Y. Cao, W. Chen, X. Kong, Y. Liu, T. Yao and Y. Lin, *Appl. Catal. B*, 2019, **240**, 234-240.
7. N. Han, Y. Wang, L. Ma, J. Wen, J. Li, H. Zheng, K. Nie, X. Wang, F. Zhao, Y. Li, J. Fan, J. Zhong, T. Wu, D.J. Miller, J. Lu, S.-T. Lee and Y. Li, *Chem*, 2017, **3**, 652-664.
8. S. Lin, C.S. Diercks, Y.-B. Zhang, N. Kornienko, E.M. Nichols, Y. Zhao, A.R. Paris, D. Kim, P. Yang, O.M. Yaghi and C.J. Chang, *Science*, 2015, **349**, 1208-1213.
9. J. Wang, X. Huang, S. Xi, J.M. Lee, C. Wang, Y. Du and X. Wang, *Angew. Chem. Int. Ed.*, 2019, **58**, 13532-13539.
10. Y. Pan, R. Lin, Y. Chen, S. Liu, W. Zhu, X. Cao, W. Chen, K. Wu, W.-C. Cheong, Y. Wang, L. Zheng, J. Luo, Y. Lin, Y. Liu, C. Liu, J. Li, Q. Lu, X. Chen, D. Wang, Q. Peng, C. Chen and Y. Li, *J. Am. Chem. Soc.*, 2018, **140**, 4218-4221.
11. M. Wang, Y. Yao, Y. Tian, Y. Yuan, L. Wang, F. Yang, J. Ren, X. Hu, F. Wu, S. Zhang, J. Wu and J. Lu, *Adv. Mater.*, 2023, **35**.
12. X. Peng, Y. Chen, Y. Mi, L. Zhuo, G. Qi, J. Ren, Y. Qiu, X. Liu and J. Luo, *Inorg. Chem.*, 2019, **58**, 8910-8914.
13. A.S. Varela, N. Ranjbar Sahraie, J. Steinberg, W. Ju, H.S. Oh and P. Strasser, *Angew. Chem. Int. Ed.*, 2015, **54**, 10758-10762.
14. F. Pan, W. Deng, C. Justiniano and Y. Li, *Appl. Catal. B*, 2018, **226**, 463-472.

15. J. Feng, H. Gao, L. Zheng, Z. Chen, S. Zeng, C. Jiang, H. Dong, L. Liu, S. Zhang and X. Zhang, *Nat. Commun.*, 2020, **11**, 4341.
16. B. Zhang, J. Zhang, J. Shi, D. Tan, L. Liu, F. Zhang, C. Lu, Z. Su, X. Tan, X. Cheng, B. Han, L. Zheng and J. Zhang, *Nat. Commun.*, 2019, **10**, 2980.
